# Supplementary material for: Skin bacterial communities of neotropical treefrogs vary with local environmental conditions at the time of sampling
Source: PeerJ journal article supplement (doi:10.7717/peerj.7044), 2019-06-21

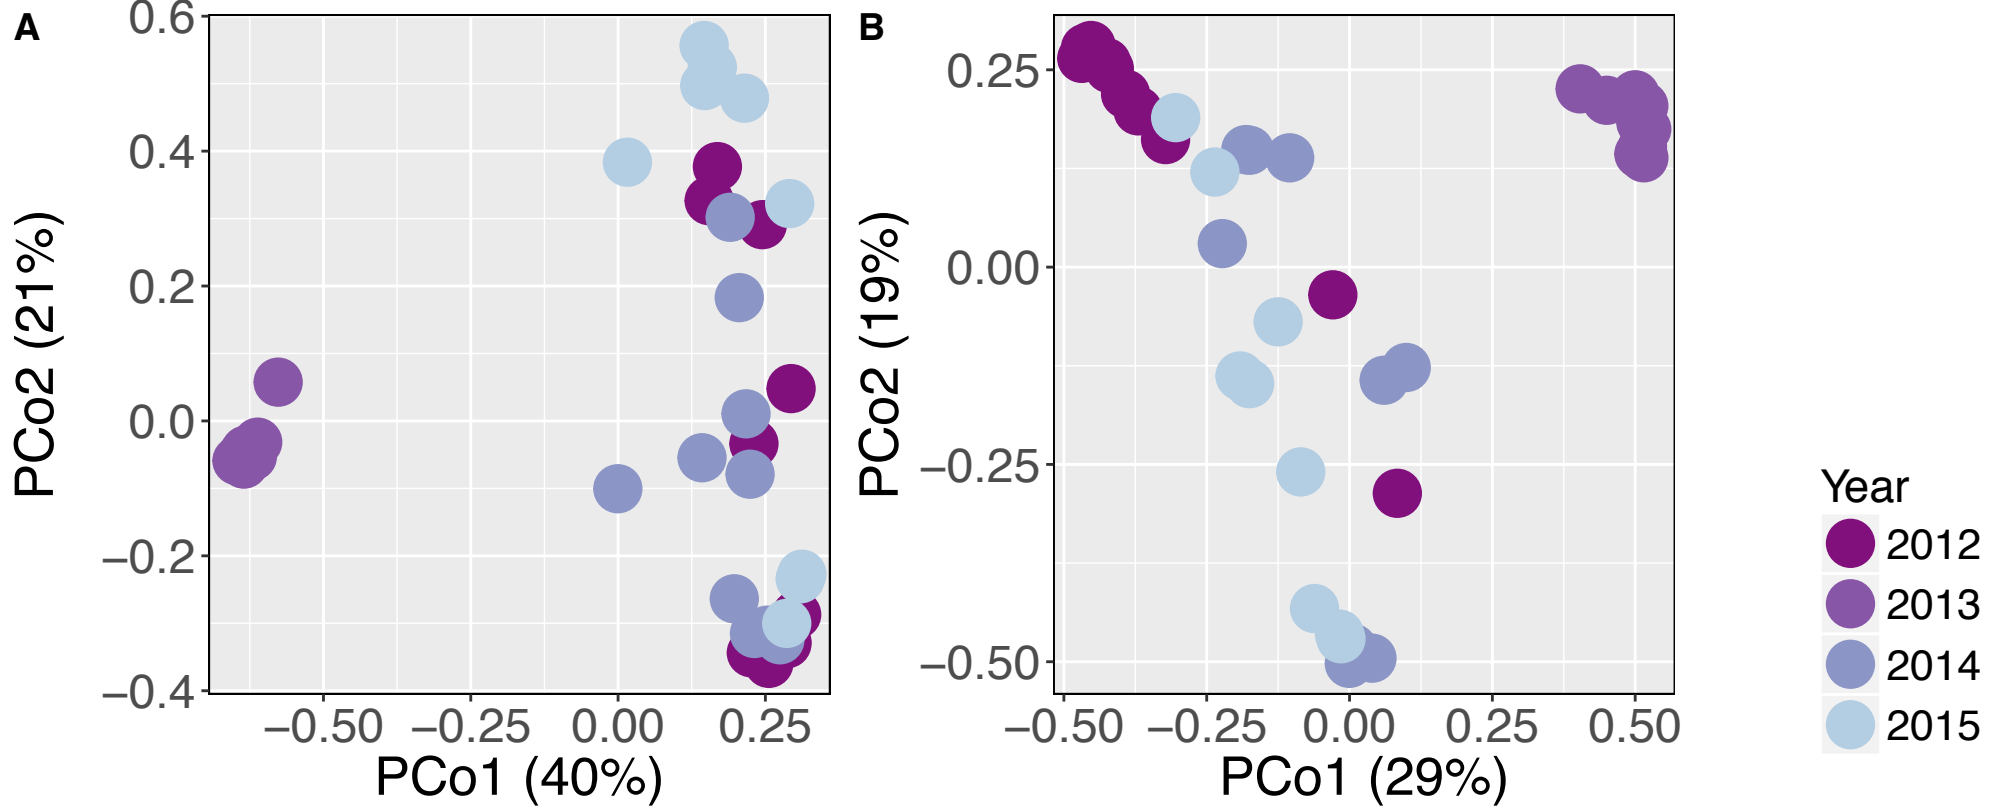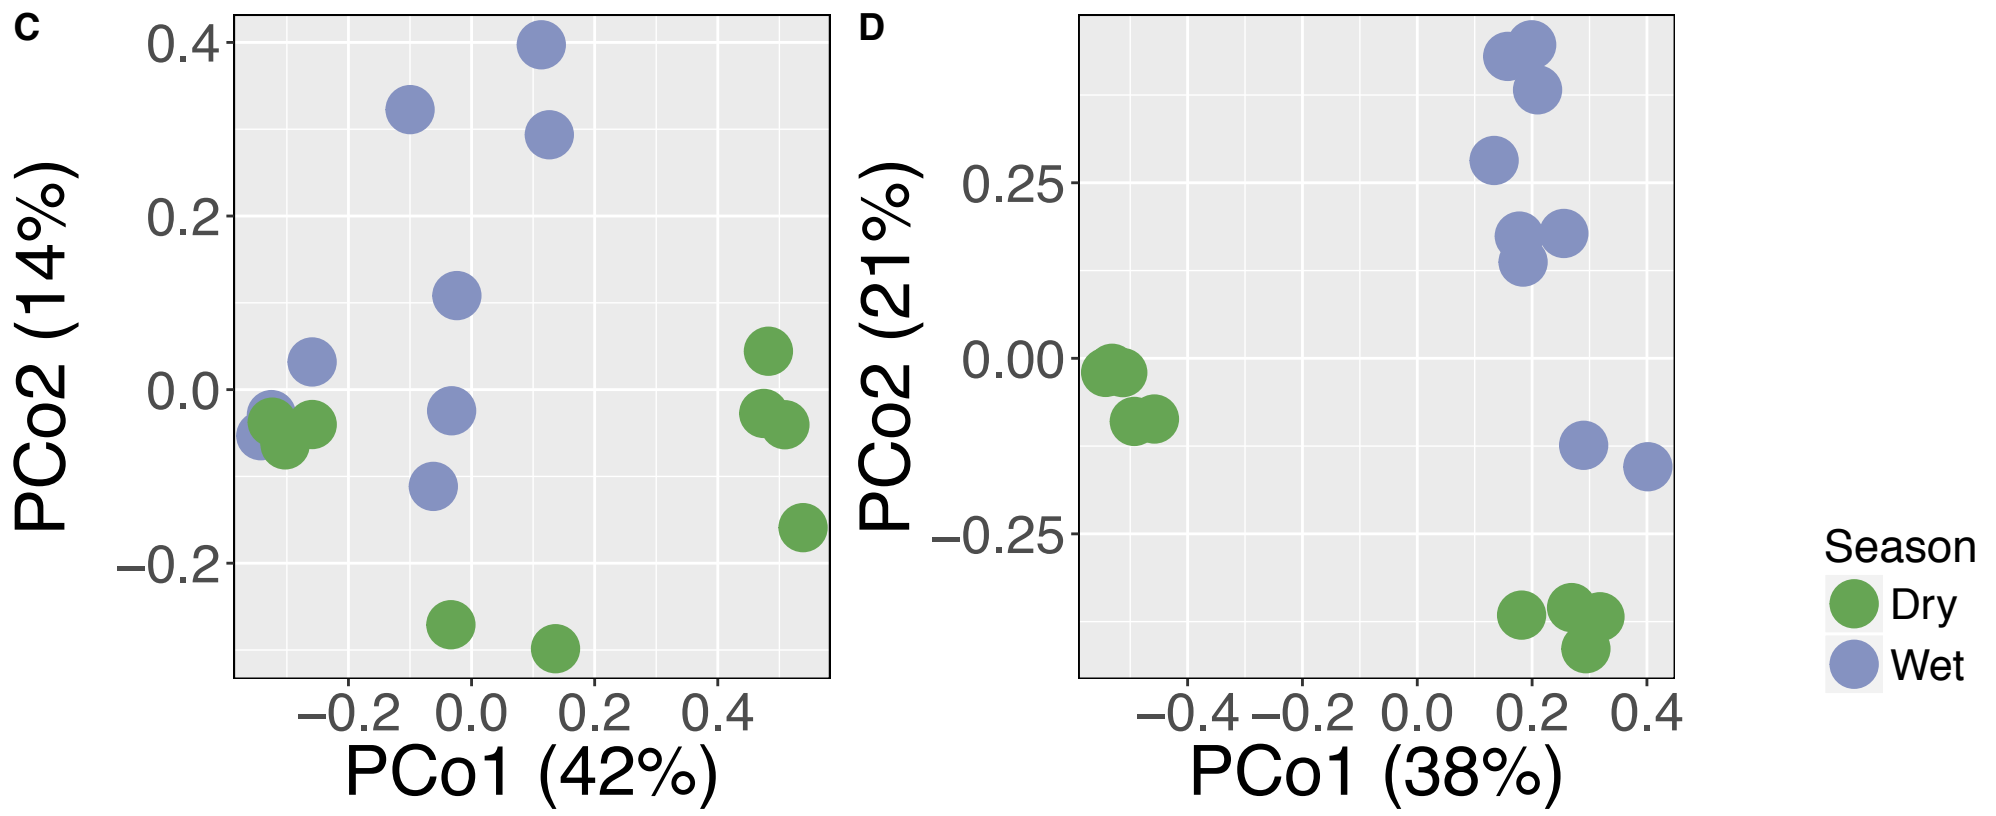

Supplement: SupplementalFigureS3.pdf [file SupplementalFigureS3.pdf]
